# Supplementary material for: Genomic characterization of malonate positive Cronobacter sakazakii serotype O:2, sequence type 64 strains, isolated from clinical, food, and environment samples
Source: PubMed Central journal article supplement (PMC5845375; doi:10.1186/s13099-018-0238-9), 2018-03-10
Supplement: 13099_2018_238_MOESM2_ESM.pdf [file 13099_2018_238_MOESM2_ESM.pdf]

Supplemental Table 2. Gene difference analysis of malonate-positive *C. sakazakii* strains compared to other *Cronobacter* and non *Cronobacter* strains\*.

| Strains          | CsakBAA894 | Csak Comp11A | Csak Comp20A | Csak Comp53A | Csak Comp45B | Csak Comp46B | Csak Comp49B | Csak Comp54A | Csak Comp19B | Csak Comp55A | Csak Comp57A | Csak Comp59A | CDC1121-73A_2 | E772 | GK1025A | GK1027A | GK1028A | GK1029B | GK1030B | GK1034A2 | GK1035A | J172 | GK1036B2 | Ctur3032 | Cuni797-2 | ConLMG26250 | C0ubCFS237 | CnalCI825 | Cmuy51329B | CQ118E.hormaeche | CQ119E.hormaeche | CQ125Ciroseclakii |
|------------------|------------|--------------|--------------|--------------|--------------|--------------|--------------|--------------|--------------|--------------|--------------|--------------|---------------|------|---------|---------|---------|---------|---------|----------|---------|------|----------|----------|-----------|-------------|------------|-----------|------------|------------------|------------------|-------------------|
| CsakBAA894       | 0          | 657          | 648          | 662          | 674          | 652          | 603          | 635          | 629          | 649          | 648          | 621          | 620           | 621  | 592     | 616     | 613     | 613     | 599     | 597      | 684     | 2676 | 1986     | 3625     | 2658      | 1920        | 2721       | 1260      | 1241       | 1305             |                  |                   |
| Csak Comp11A     | 657        | 0            | 0            | 159          | 157          | 129          | 115          | 119          | 14           | 16           | 169          | 179          | 184           | 156  | 164     | 164     | 165     | 160     | 165     | 153      | 219     | 497  | 2397     | 1683     | 3245      | 2358        | 1536       | 2387      | 1005       | 1022             | 1041             |                   |
| Csak Comp20A     | 648        | 0            | 0            | 156          | 162          | 125          | 102          | 105          | 11           | 10           | 163          | 171          | 175           | 148  | 158     | 152     | 154     | 153     | 153     | 154      | 201     | 471  | 2263     | 1604     | 3099      | 2178        | 1508       | 2251      | 926        | 949              | 974              |                   |
| Csak Comp53A     | 662        | 0            | 0            | 169          | 167          | 135          | 113          | 113          | 14           | 13           | 176          | 188          | 189           | 160  | 168     | 171     | 170     | 171     | 176     | 166      | 228     | 505  | 2397     | 1703     | 3266      | 2365        | 1586       | 2409      | 1052       | 1081             | 1099             |                   |
| Csak Comp45B     | 674        | 159          | 156          | 169          | 0            | 128          | 109          | 111          | 179          | 177          | 171          | 216          | 164           | 149  | 157     | 155     | 153     | 155     | 157     | 147      | 154     | 480  | 2365     | 1655     | 3151      | 2266        | 1575       | 2335      | 1098       | 1084             | 1147             |                   |
| Csak Comp46B     | 652        | 157          | 162          | 167          | 0            | 116          | 113          | 116          | 177          | 172          | 168          | 210          | 158           | 135  | 144     | 144     | 147     | 146     | 147     | 141      | 153     | 461  | 2305     | 1579     | 3095      | 2223        | 1507       | 2246      | 1004       | 967              | 1042             |                   |
| Csak Comp49B     | 603        | 129          | 125          | 135          | 128          | 116          | 0            | 37           | 42           | 121          | 120          | 159          | 136           | 156  | 143     | 155     | 152     | 152     | 150     | 154      | 144     | 145  | 415      | 2202     | 1494      | 3025        | 2196       | 1441      | 2193       | 946              | 882              | 969               |
| Csak Comp54A     | 635        | 115          | 102          | 113          | 109          | 113          | 37           | 0            | 97           | 90           | 142          | 176          | 156           | 163  | 156     | 156     | 154     | 157     | 151     | 148      | 148     | 462  | 2296     | 1590     | 2983      | 2226        | 1550       | 2242      | 1054       | 1015             | 1106             |                   |
| Csak Comp19B     | 629        | 119          | 105          | 113          | 111          | 116          | 42           | 0            | 94           | 91           | 137          | 178          | 159           | 161  | 154     | 160     | 158     | 151     | 157     | 155      | 143     | 459  | 2230     | 1552     | 2961      | 2188        | 1542       | 2201      | 1041       | 999              | 1096             |                   |
| Csak Comp55A     | 649        | 14           | 11           | 14           | 179          | 177          | 121          | 97           | 94           | 0            | 163          | 171          | 172           | 171  | 183     | 182     | 183     | 182     | 183     | 175      | 221     | 489  | 2397     | 1736     | 3245      | 2404        | 1610       | 2430      | 1063       | 1087             | 1121             |                   |
| Csak Comp57A     | 648        | 16           | 10           | 13           | 177          | 172          | 120          | 90           | 91           | 0            | 156          | 170          | 173           | 169  | 180     | 174     | 174     | 177     | 178     | 168      | 213     | 488  | 2318     | 1680     | 3162      | 2318        | 1558       | 2343      | 1022       | 1032             | 1077             |                   |
| Csak Comp59A     | 621        | 169          | 163          | 176          | 171          | 168          | 159          | 142          | 137          | 163          | 156          | 0            | 182           | 157  | 148     | 158     | 155     | 159     | 155     | 158      | 154     | 177  | 455      | 2347     | 1691      | 3152        | 2312       | 1557      | 2337       | 1016             | 973              | 1085              |
| CDC1121-73A_2    | 620        | 179          | 171          | 188          | 216          | 210          | 136          | 176          | 178          | 171          | 170          | 182          | 0             | 168  | 167     | 181     | 177     | 176     | 176     | 179      | 170     | 174  | 447      | 2243     | 1654      | 3216        | 2268       | 1456      | 2333       | 1074             | 1057             | 1116              |
| E772             | 621        | 184          | 175          | 189          | 164          | 158          | 156          | 156          | 159          | 172          | 173          | 157          | 168           | 0    | 51      | 50      | 49      | 51      | 48      | 50       | 45      | 113  | 398      | 2397     | 1681      | 3251        | 2391       | 1513      | 2407       | 1069             | 1070             | 1136              |
| GK1025A          | 592        | 156          | 148          | 160          | 149          | 135          | 143          | 163          | 161          | 171          | 169          | 148          | 167           | 51   | 0       | 0       | 0       | 0       | 0       | 0        | 0       | 121  | 391      | 2229     | 1546      | 3047        | 2222       | 1419      | 2251       | 945              | 904              | 977               |
| GK1027A          | 616        | 164          | 158          | 168          | 157          | 144          | 155          | 156          | 154          | 183          | 180          | 158          | 181           | 50   | 0       | 0       | 0       | 0       | 0       | 0        | 0       | 120  | 406      | 2323     | 1626      | 3189        | 2277       | 1516      | 2341       | 1051             | 1049             | 1119              |
| GK1028A          | 613        | 164          | 152          | 171          | 155          | 144          | 152          | 156          | 160          | 182          | 174          | 155          | 177           | 49   | 0       | 0       | 0       | 0       | 0       | 0        | 0       | 121  | 404      | 2324     | 1620      | 3202        | 2296       | 1480      | 2343       | 1032             | 1017             | 1078              |
| GK1029B          | 613        | 165          | 154          | 170          | 153          | 147          | 152          | 156          | 158          | 183          | 174          | 159          | 176           | 51   | 0       | 0       | 0       | 0       | 0       | 0        | 0       | 125  | 405      | 2299     | 1601      | 3162        | 2246       | 1476      | 2303       | 1023             | 995              | 1073              |
| GK1030B          | 618        | 160          | 153          | 171          | 155          | 146          | 150          | 154          | 151          | 182          | 177          | 155          | 176           | 48   | 0       | 0       | 0       | 0       | 0       | 0        | 0       | 116  | 409      | 2337     | 1631      | 3193        | 2294       | 1509      | 2326       | 1050             | 1047             | 1105              |
| GK1034A2         | 615        | 165          | 153          | 176          | 157          | 147          | 154          | 157          | 157          | 183          | 178          | 158          | 179           | 50   | 0       | 0       | 0       | 0       | 0       | 0        | 0       | 120  | 407      | 2315     | 1637      | 3167        | 2259       | 1519      | 2348       | 1072             | 1052             | 1143              |
| GK1035A          | 599        | 153          | 154          | 166          | 147          | 141          | 144          | 151          | 155          | 175          | 168          | 154          | 170           | 45   | 0       | 0       | 0       | 0       | 0       | 0        | 0       | 112  | 398      | 2297     | 1583      | 3150        | 2246       | 1469      | 2292       | 990              | 968              | 1026              |
| J172             | 597        | 219          | 201          | 228          | 154          | 153          | 145          | 148          | 143          | 221          | 213          | 177          | 174           | 113  | 121     | 120     | 121     | 125     | 116     | 120      | 112     | 0    | 403      | 2227     | 1550      | 3029        | 2105       | 1481      | 2142       | 1025             | 1009             | 1065              |
| GK1036B2         | 684        | 497          | 471          | 505          | 480          | 461          | 415          | 462          | 459          | 489          | 488          | 455          | 447           | 398  | 391     | 406     | 404     | 405     | 409     | 407      | 398     | 403  | 0        | 2372     | 1721      | 3252        | 2339       | 1581      | 2413       | 1085             | 1075             | 1156              |
| Ctur3032         | 2676       | 2397         | 2263         | 2397         | 2365         | 2305         | 2202         | 2296         | 2230         | 2397         | 2318         | 2347         | 2243          | 2397 | 2229    | 2323    | 2324    | 2299    | 2337    | 2315     | 2297    | 2227 | 2372     | 0        | 2059      | 3932        | 2920       | 2420      | 2924       | 1361             | 1291             | 1416              |
| Cuni797-2        | 1986       | 1683         | 1604         | 1703         | 1655         | 1579         | 1494         | 1590         | 1552         | 1736         | 1680         | 1691         | 1654          | 1681 | 1546    | 1626    | 1620    | 1601    | 1631    | 1637     | 1583    | 1550 | 1721     | 2059     | 0         | 3164        | 2185       | 1800      | 2217       | 1072             | 1032             | 1064              |
| ConLMG26250      | 3625       | 3245         | 3099         | 3266         | 3151         | 3095         | 3025         | 2983         | 2961         | 3245         | 3162         | 3152         | 3216          | 3251 | 3047    | 3189    | 3202    | 3162    | 3193    | 3167     | 3150    | 3029 | 3252     | 3932     | 3164      | 0           | 3116       | 3465      | 3338       | 1790             | 1761             | 1804              |
| CdubCFS237       | 2658       | 2358         | 2178         | 2365         | 2266         | 2223         | 2196         | 2226         | 2188         | 2404         | 2318         | 2312         | 2268          | 2391 | 2222    | 2277    | 2296    | 2246    | 2294    | 2259     | 2246    | 2105 | 2339     | 2920     | 2185      | 3116        | 0          | 2476      | 2208       | 1138             | 1102             | 1179              |
| CnalCI825        | 1920       | 1536         | 1508         | 1586         | 1575         | 1507         | 1441         | 1550         | 1542         | 1610         | 1558         | 1557         | 1456          | 1513 | 1419    | 1516    | 1480    | 1476    | 1509    | 1519     | 1469    | 1481 | 1581     | 2420     | 1800      | 3465        | 2476       | 0         | 2557       | 1198             | 1158             | 1212              |
| Cmuy51329B       | 2721       | 2387         | 2251         | 2409         | 2335         | 2246         | 2193         | 2242         | 2201         | 2430         | 2343         | 2337         | 2333          | 2407 | 2251    | 2341    | 2343    | 2303    | 2326    | 2348     | 2292    | 2142 | 2413     | 2924     | 2217      | 3338        | 2208       | 2557      | 0          | 1260             | 1221             | 1222              |
| Q118E.hormaeche  | 1260       | 1005         | 926          | 1052         | 1098         | 1004         | 946          | 1054         | 1041         | 1063         | 1022         | 1016         | 1074          | 1069 | 945     | 1051    | 1032    | 1023    | 1050    | 1072     | 990     | 1025 | 1085     | 1361     | 1072      | 1790        | 1138       | 1198      | 1260       | 0                | 63               | 111               |
| Q119E.hormaeche  | 1241       | 1022         | 949          | 1081         | 1084         | 967          | 882          | 1015         | 999          | 1087         | 1032         | 973          | 1057          | 1070 | 904     | 1049    | 1017    | 995     | 1047    | 1052     | 968     | 1009 | 1075     | 1291     | 1032      | 1761        | 1102       | 1158      | 1221       | 63               | 0                | 120               |
| Q125Ciroseclakii | 1305       | 1041         | 974          | 1099         | 1147         | 1042         | 969          | 1106         | 1096         | 1121         | 1077         | 1085         | 1116          | 1136 | 977     | 1119    | 1078    | 1073    | 1105    | 1143     | 1026    | 1065 | 1156     | 1416     | 1064      | 1804        | 1179       | 1212      | 1222       | 111              | 120              | 0                 |

\* Gene difference analysis was performed as described by Tall *et al.* [15] using the Affymetrix algorithm. Cells highlighted in dark green represent a lower number of gene differences among the strains. Cells highlighted in red represent a higher number of gene differences.
