# Supplementary material for: Genomic characterization of malonate positive Cronobacter sakazakii serotype O:2, sequence type 64 strains, isolated from clinical, food, and environment samples
Source: Springer Nature journal article supplement (doi:10.1186/s13099-018-0238-9), 2018-03-10
Supplement: MOESM1 [file 15524760]

Supplemental Table 1. Pearson's correlation analysis of malonate-positive *C. sakazakii* strains compared to other *Cronobacter* and non *Cronobacter* strains\*.

| Strains             | CsakBAA894 | Csak Comp54A | Csak Comp19B | Csak Comp11A | Csak Comp20A | Csak Comp53A | Csak Comp45B | Csak Comp46B | Csak Comp49B | Csak Comp57A | Csak Comp59A | E772 | GK1025A | GK1027A | GK1028A | GK1029B | GK1030B | GK1034A2 | GK1035A | CDC1121-73A_2 | J172 | Ctur3032 | Cuni797-2 | CconLMG26250 | CdubCFS237 | CmalC1825 | Cmuy51329B | CQ118E. hormaechei | CQ119E.hormaechei | CQ125.Citrosellakii |
|---------------------|------------|--------------|--------------|--------------|--------------|--------------|--------------|--------------|--------------|--------------|--------------|------|---------|---------|---------|---------|---------|----------|---------|---------------|------|----------|-----------|--------------|------------|-----------|------------|--------------------|-------------------|---------------------|
| CsakBAA894          | 1.00       | 0.74         | 0.74         | 0.82         | 0.78         | 0.81         | 0.80         | 0.80         | 0.80         | 0.80         | 0.81         | 0.81 | 0.80    | 0.81    | 0.82    | 0.82    | 0.81    | 0.79     | 0.81    | 0.82          | 0.82 | 0.45     | 0.51      | 0.28         | 0.30       | 0.58      | 0.30       | 0.40               | 0.42              | 0.40                |
| Csak Comp54A        | 0.74       | 1.00         | 0.97         | 0.83         | 0.91         | 0.85         | 0.84         | 0.81         | 0.84         | 0.90         | 0.88         | 0.85 | 0.83    | 0.84    | 0.82    | 0.82    | 0.85    | 0.85     | 0.85    | 0.82          | 0.85 | 0.37     | 0.48      | 0.21         | 0.22       | 0.52      | 0.27       | 0.31               | 0.30              | 0.27                |
| Csak Comp19B        | 0.74       | 0.97         | 1.00         | 0.82         | 0.90         | 0.85         | 0.84         | 0.81         | 0.83         | 0.90         | 0.87         | 0.84 | 0.82    | 0.84    | 0.82    | 0.82    | 0.85    | 0.85     | 0.83    | 0.82          | 0.84 | 0.37     | 0.47      | 0.22         | 0.22       | 0.52      | 0.27       | 0.31               | 0.30              | 0.27                |
| Csak Comp11A        | 0.82       | 0.83         | 0.82         | 1.00         | 0.92         | 0.96         | 0.94         | 0.93         | 0.92         | 0.94         | 0.91         | 0.91 | 0.91    | 0.92    | 0.93    | 0.94    | 0.92    | 0.90     | 0.92    | 0.93          | 0.92 | 0.47     | 0.54      | 0.31         | 0.31       | 0.62      | 0.31       | 0.44               | 0.44              | 0.44                |
| Csak Comp20A        | 0.78       | 0.91         | 0.90         | 0.92         | 1.00         | 0.94         | 0.91         | 0.87         | 0.86         | 0.96         | 0.93         | 0.89 | 0.86    | 0.91    | 0.89    | 0.89    | 0.91    | 0.91     | 0.90    | 0.88          | 0.90 | 0.43     | 0.52      | 0.26         | 0.27       | 0.58      | 0.29       | 0.40               | 0.38              | 0.37                |
| Csak Comp53A        | 0.81       | 0.85         | 0.85         | 0.96         | 0.94         | 1.00         | 0.95         | 0.92         | 0.89         | 0.96         | 0.93         | 0.92 | 0.88    | 0.94    | 0.93    | 0.93    | 0.93    | 0.91     | 0.92    | 0.92          | 0.46 | 0.54     | 0.30      | 0.30         | 0.61       | 0.30      | 0.43       | 0.43               | 0.42              |                     |
| Csak Comp45B        | 0.80       | 0.84         | 0.84         | 0.94         | 0.91         | 0.95         | 1.00         | 0.95         | 0.89         | 0.93         | 0.93         | 0.91 | 0.88    | 0.94    | 0.93    | 0.93    | 0.93    | 0.93     | 0.91    | 0.92          | 0.93 | 0.46     | 0.54      | 0.31         | 0.31       | 0.61      | 0.31       | 0.41               | 0.41              | 0.39                |
| Csak Comp46B        | 0.80       | 0.81         | 0.81         | 0.93         | 0.87         | 0.92         | 0.95         | 1.00         | 0.92         | 0.89         | 0.88         | 0.90 | 0.91    | 0.91    | 0.92    | 0.92    | 0.90    | 0.88     | 0.91    | 0.92          | 0.91 | 0.47     | 0.54      | 0.32         | 0.33       | 0.62      | 0.32       | 0.42               | 0.44              | 0.43                |
| Csak Comp49B        | 0.80       | 0.84         | 0.83         | 0.92         | 0.86         | 0.89         | 0.89         | 0.92         | 1.00         | 0.88         | 0.86         | 0.89 | 0.92    | 0.88    | 0.90    | 0.90    | 0.88    | 0.85     | 0.90    | 0.92          | 0.90 | 0.46     | 0.53      | 0.30         | 0.32       | 0.61      | 0.32       | 0.41               | 0.43              | 0.42                |
| Csak Comp57A        | 0.80       | 0.90         | 0.90         | 0.94         | 0.96         | 0.96         | 0.93         | 0.89         | 0.88         | 1.00         | 0.95         | 0.92 | 0.87    | 0.93    | 0.91    | 0.91    | 0.92    | 0.93     | 0.91    | 0.91          | 0.92 | 0.45     | 0.53      | 0.27         | 0.28       | 0.60      | 0.30       | 0.41               | 0.40              | 0.38                |
| Csak Comp59A        | 0.81       | 0.88         | 0.87         | 0.91         | 0.93         | 0.93         | 0.88         | 0.86         | 0.95         | 1.00         | 0.92         | 0.87 | 0.93    | 0.91    | 0.91    | 0.93    | 0.93    | 0.90     | 0.90    | 0.92          | 0.45 | 0.53     | 0.28      | 0.28         | 0.60       | 0.30      | 0.43       | 0.42               | 0.39              |                     |
| E772                | 0.81       | 0.85         | 0.84         | 0.91         | 0.89         | 0.92         | 0.91         | 0.90         | 0.89         | 0.92         | 0.92         | 1.00 | 0.92    | 0.95    | 0.95    | 0.95    | 0.94    | 0.94     | 0.92    | 0.93          | 0.45 | 0.54     | 0.29      | 0.29         | 0.62       | 0.31      | 0.39       | 0.40               | 0.39              |                     |
| GK1025A             | 0.80       | 0.83         | 0.82         | 0.91         | 0.86         | 0.88         | 0.88         | 0.91         | 0.92         | 0.87         | 0.87         | 0.92 | 1.00    | 0.92    | 0.94    | 0.95    | 0.93    | 0.90     | 0.95    | 0.90          | 0.91 | 0.45     | 0.53      | 0.29         | 0.31       | 0.62      | 0.32       | 0.40               | 0.42              | 0.40                |
| GK1027A             | 0.81       | 0.84         | 0.84         | 0.92         | 0.91         | 0.94         | 0.94         | 0.91         | 0.88         | 0.93         | 0.93         | 0.95 | 0.92    | 1.00    | 0.97    | 0.97    | 0.98    | 0.97     | 0.95    | 0.92          | 0.94 | 0.46     | 0.55      | 0.30         | 0.30       | 0.62      | 0.31       | 0.41               | 0.42              | 0.40                |
| GK1028A             | 0.82       | 0.82         | 0.82         | 0.93         | 0.89         | 0.93         | 0.93         | 0.92         | 0.90         | 0.91         | 0.91         | 0.95 | 0.94    | 0.97    | 1.00    | 0.98    | 0.97    | 0.95     | 0.96    | 0.93          | 0.94 | 0.47     | 0.55      | 0.30         | 0.31       | 0.63      | 0.32       | 0.41               | 0.43              | 0.41                |
| GK1029B             | 0.82       | 0.82         | 0.82         | 0.94         | 0.89         | 0.93         | 0.93         | 0.92         | 0.90         | 0.91         | 0.91         | 0.95 | 0.95    | 0.97    | 0.98    | 1.00    | 0.97    | 0.95     | 0.97    | 0.93          | 0.94 | 0.47     | 0.55      | 0.31         | 0.32       | 0.63      | 0.32       | 0.42               | 0.43              | 0.42                |
| GK1030B             | 0.81       | 0.85         | 0.85         | 0.92         | 0.91         | 0.93         | 0.93         | 0.90         | 0.88         | 0.92         | 0.93         | 0.95 | 0.93    | 0.98    | 0.97    | 0.97    | 1.00    | 0.96     | 0.96    | 0.92          | 0.94 | 0.45     | 0.54      | 0.29         | 0.29       | 0.62      | 0.30       | 0.41               | 0.41              | 0.39                |
| GK1034A2            | 0.79       | 0.85         | 0.85         | 0.90         | 0.91         | 0.93         | 0.88         | 0.85         | 0.93         | 0.93         | 0.94         | 0.90 | 0.97    | 0.95    | 0.95    | 0.96    | 1.00    | 0.94     | 0.91    | 0.93          | 0.45 | 0.54     | 0.28      | 0.29         | 0.61       | 0.31      | 0.39       | 0.38               | 0.36              |                     |
| GK1035A             | 0.81       | 0.85         | 0.83         | 0.92         | 0.90         | 0.91         | 0.91         | 0.91         | 0.90         | 0.91         | 0.90         | 0.94 | 0.95    | 0.95    | 0.96    | 0.97    | 0.96    | 0.94     | 1.00    | 0.92          | 0.94 | 0.46     | 0.54      | 0.29         | 0.31       | 0.62      | 0.32       | 0.41               | 0.42              | 0.40                |
| CDC1121-73A_2       | 0.82       | 0.82         | 0.82         | 0.93         | 0.88         | 0.92         | 0.92         | 0.92         | 0.91         | 0.90         | 0.92         | 0.90 | 0.92    | 0.93    | 0.93    | 0.92    | 0.91    | 0.92     | 1.00    | 0.93          | 0.49 | 0.54     | 0.30      | 0.32         | 0.64       | 0.32      | 0.40       | 0.41               | 0.40              |                     |
| J172                | 0.82       | 0.85         | 0.84         | 0.92         | 0.90         | 0.92         | 0.93         | 0.91         | 0.90         | 0.92         | 0.92         | 0.93 | 0.91    | 0.94    | 0.94    | 0.94    | 0.94    | 0.93     | 0.94    | 0.93          | 1.00 | 0.47     | 0.55      | 0.31         | 0.33       | 0.62      | 0.34       | 0.41               | 0.42              | 0.40                |
| Ctur3032            | 0.45       | 0.37         | 0.37         | 0.47         | 0.43         | 0.46         | 0.46         | 0.47         | 0.46         | 0.45         | 0.45         | 0.45 | 0.46    | 0.47    | 0.47    | 0.45    | 0.45    | 0.46     | 0.46    | 0.49          | 0.47 | 1.00     | 0.55      | 0.28         | 0.29       | 0.48      | 0.29       | 0.40               | 0.41              | 0.39                |
| Cuni797-2           | 0.51       | 0.48         | 0.47         | 0.54         | 0.52         | 0.54         | 0.54         | 0.54         | 0.53         | 0.53         | 0.53         | 0.54 | 0.53    | 0.55    | 0.55    | 0.55    | 0.54    | 0.54     | 0.54    | 0.54          | 0.55 | 0.55     | 1.00      | 0.30         | 0.32       | 0.55      | 0.34       | 0.40               | 0.40              | 0.39                |
| CconLMG26250        | 0.28       | 0.21         | 0.22         | 0.31         | 0.26         | 0.30         | 0.31         | 0.32         | 0.30         | 0.27         | 0.28         | 0.29 | 0.29    | 0.30    | 0.30    | 0.31    | 0.29    | 0.28     | 0.29    | 0.30          | 0.31 | 0.28     | 0.30      | 1.00         | 0.36       | 0.29      | 0.30       | 0.39               | 0.40              | 0.40                |
| CdubCFS237          | 0.30       | 0.22         | 0.22         | 0.31         | 0.27         | 0.30         | 0.31         | 0.33         | 0.32         | 0.28         | 0.28         | 0.29 | 0.31    | 0.30    | 0.31    | 0.32    | 0.29    | 0.29     | 0.31    | 0.32          | 0.33 | 0.29     | 0.32      | 0.36         | 1.00       | 0.31      | 0.45       | 0.37               | 0.38              | 0.38                |
| CmalC1825           | 0.58       | 0.52         | 0.52         | 0.62         | 0.58         | 0.61         | 0.61         | 0.62         | 0.61         | 0.60         | 0.60         | 0.62 | 0.62    | 0.62    | 0.63    | 0.63    | 0.62    | 0.61     | 0.62    | 0.64          | 0.62 | 0.48     | 0.55      | 0.29         | 0.31       | 1.00      | 0.32       | 0.40               | 0.42              | 0.40                |
| Cmuy51329B          | 0.30       | 0.27         | 0.27         | 0.31         | 0.29         | 0.30         | 0.31         | 0.32         | 0.32         | 0.30         | 0.30         | 0.31 | 0.32    | 0.31    | 0.32    | 0.32    | 0.30    | 0.31     | 0.32    | 0.32          | 0.34 | 0.29     | 0.34      | 0.30         | 0.45       | 0.32      | 1.00       | 0.35               | 0.34              | 0.34                |
| CQ118E. hormaechei  | 0.40       | 0.31         | 0.31         | 0.44         | 0.40         | 0.43         | 0.41         | 0.42         | 0.41         | 0.41         | 0.43         | 0.39 | 0.40    | 0.41    | 0.41    | 0.42    | 0.41    | 0.39     | 0.41    | 0.40          | 0.41 | 0.40     | 0.40      | 0.39         | 0.37       | 0.40      | 0.35       | 1.00               | 0.87              | 0.64                |
| CQ119E.hormaechei   | 0.42       | 0.30         | 0.30         | 0.44         | 0.38         | 0.43         | 0.41         | 0.44         | 0.43         | 0.40         | 0.42         | 0.40 | 0.42    | 0.42    | 0.43    | 0.43    | 0.41    | 0.38     | 0.42    | 0.41          | 0.42 | 0.41     | 0.40      | 0.40         | 0.38       | 0.42      | 0.34       | 0.87               | 1.00              | 0.66                |
| CQ125.Citrosellakii | 0.40       | 0.27         | 0.27         | 0.44         | 0.37         | 0.42         | 0.39         | 0.43         | 0.42         | 0.38         | 0.39         | 0.39 | 0.40    | 0.40    | 0.41    | 0.42    | 0.39    | 0.36     | 0.40    | 0.40          | 0.40 | 0.39     | 0.39      | 0.40         | 0.38       | 0.40      | 0.34       | 0.64               | 0.66              | 1.00                |

\* Pearson's correlation analysis was performed as described by Tall *et al.* [15] using the Affymetrix algorithm. Cells highlighted in dark green represent a lower number of gene differences among the strains. Cells highlighted in red represent a higher number of gene differences.
