# Supplementary material for: Genomic characterization of malonate positive Cronobacter sakazakii serotype O:2, sequence type 64 strains, isolated from clinical, food, and environment samples
Source: Springer Nature journal article supplement (doi:10.1186/s13099-018-0238-9), 2018-03-10
Supplement: MOESM4 [file 15524760]

Supplemental Table 3. Description of malonate utilization operon in ST64 *Cronobacter* strains described in this study.

| Malonate operon gene size in <i>Cronobacter</i> species (bp) |         |         |         |        |        |        |        |        |        |        |        |         |         |         |         |         |         |         |         |      |           |        |           |
|--------------------------------------------------------------|---------|---------|---------|--------|--------|--------|--------|--------|--------|--------|--------|---------|---------|---------|---------|---------|---------|---------|---------|------|-----------|--------|-----------|
| Malonate utilization operon gene                             | Comp 11 | Comp 19 | Comp 20 | Comp29 | Comp46 | Comp49 | Comp53 | Comp54 | Comp55 | Comp57 | Comp59 | GK 1025 | GK 1026 | GK 1027 | GK 1029 | GK 1030 | GK 1034 | GK 1035 | GK 1326 | E722 | H169/1/16 | Jor172 | C.sak 112 |
| Malonate decarboxylase alpha subunit                         | 1656    | 1656    | 1656    | 1656   | 1656   | 1656   | 1656   | 1656   | 1656   | 1656   | 1656   | 1656    | 1656    | 1656    | 1656    | 1656    | 1656    | 1656    | 1656    | 1656 | 1656      | 1656   | 1656      |
| Triphosphoribosyl-dephospho-CoA synthetase (EC 2.7.8.25)     | 861     | 861     | 861     | 861    | 861    | 861    | 861    | 861    | 861    | 861    | 861    | 861     | 861     | 861     | 861     | 861     | 861     | 861     | 861     | 861  | 861       | 861    | 861       |
| Malonate decarboxylase delta subunit                         | 219     | 219     | 219     | 219    | 219    | 219    | 219    | 219    | 219    | 219    | 219    | 219     | 219     | 300     | 219     | 219     | 219     | 219     | 219     | 300  | 219       | 219    | 300       |
| Malonate decarboxylase beta subunit                          | 834     | 834     | 834     | 834    | 834    | 834    | 834    | 834    | 834    | 834    | 834    | 834     | 834     | 834     | 834     | 834     | 834     | 834     | 834     | 834  | 834       | 834    | 834       |
| Malonate decarboxylase gamma subunit                         | 801     | 801     | 801     | 801    | 801    | 801    | 801    | 801    | 801    | 801    | 801    | 801     | 801     | 801     | 801     | 801     | 801     | 801     | 801     | 801  | 801       | 801    | 801       |
| auxin efflux carrier / FIG00613710: hypothetical protein     | 960     | 960     | 960     | 960    | 960    | 960    | 960    | 960    | 960    | 960    | 960    | 960     | 960     | 960     | 960     | 960     | 960     | 960     | 960     | 960  | 960       | 960    | 603       |
| Phosphoribosyl-dephospho-CoA transferase (EC 2.7.7.-)        | 621     | 621     | 621     | 621    | 621    | 621    | 621    | 621    | 621    | 621    | 621    | 621     | 621     | 621     | 621     | 621     | 621     | 621     | 621     | 621  | 621       | 621    | 621       |
| Malonyl CoA acyl carrier protein transacylase (EC 2.3.1.39)  | 903     | 903     | 903     | 903    | 903    | 903    | 903    | 903    | 903    | 903    | 903    | 903     | 903     | 903     | 903     | 903     | 903     | 903     | 903     | 903  | 903       | 903    | 903       |
| Malonate utilization transcriptional regulator               | 930     | 930     | 930     | 930    | 930    | 930    | 930    | 930    | 930    | 930    | 930    | 930     | 930     | 930     | 930     | 930     | 930     | 930     | 930     | 930  | 930       | 930    | 930       |
| Total size of operon (bp)                                    | 7785    | 7785    | 7785    | 7785   | 7785   | 7785   | 7785   | 7785   | 7785   | 7785   | 7785   | 7785    | 7785    | 7866    | 7785    | 7785    | 7785    | 7785    | 7785    | 7866 | 7785      | 7785   | 7509      |
