# Supplementary material for: Genomic characterization of malonate positive Cronobacter sakazakii serotype O:2, sequence type 64 strains, isolated from clinical, food, and environment samples
Source: Gut Pathog. 2018 Mar 10;10:11. doi: 10.1186/s13099-018-0238-9 (PMC5845375; doi:10.1186/s13099-018-0238-9)
Supplement: Supplementary file 5 — Additional file 5: Table S4. Additional table. [file 13099_2018_238_MOESM5_ESM.pdf]

Table 3. Monomer-to-monomer ratio, methacrylate-to-methacrylate (M/M) ratio, and mean monomer and hydrolysis results of crosslinkers in the methacrylate monomerization of methacrylate monomer (methacrylate monomer) and 1,1,1,1-tetrafluoroethane.

[illegible]

<sup>2</sup> Presence/absence and its opposite absence of the allele. Presence/absence calls were determined using the Affymetrix algorithm as described by Tai et al. [15].
